# Supplementary material
Source: publisher figshare collection journal article supplement (https://gsajournals.figshare.com/ndownloader/files/17710721)
Supplement: Supplementary file 1 [file 17710721]

**TABLE S3**

**Optical mapping - Reference assemblies**

| For each Sample, optical maps were obtained for two labelling enzymes. These optical maps were then aligned to optical map references of both the mm10 and the PWK/PHJ genomes. Optical map references are computed, based on the in-silico presence of enzyme recognition site in the reference genome. For each assembly, the total number of contigs, genome N50 and total assembled genome length, in Mb is summarized. |
| --- |
